# Supplementary material
Source: PubMed Central journal article supplement (PMC4718875)
Supplement: NIHMS738069-supplement-Supplemental_Material.pdf [file NIHMS738069-supplement-Supplemental_Material.pdf]

## **SUPPLEMENTAL MATERIAL**

**Supplemental Table 1.** Definition of covariates analyzed among KPSC members at baseline.

| Covariate                           | Definition                                                                                                                                                                                                                                                                                                                                                                                                                                                                                                                                                                                                                                                                                                                                                                                                                                                                                                                                                                                                                                     |
|-------------------------------------|------------------------------------------------------------------------------------------------------------------------------------------------------------------------------------------------------------------------------------------------------------------------------------------------------------------------------------------------------------------------------------------------------------------------------------------------------------------------------------------------------------------------------------------------------------------------------------------------------------------------------------------------------------------------------------------------------------------------------------------------------------------------------------------------------------------------------------------------------------------------------------------------------------------------------------------------------------------------------------------------------------------------------------------------|
| Education                           | Based on block level 2000 US census data linked through KPSC members' addresses using geocoding.                                                                                                                                                                                                                                                                                                                                                                                                                                                                                                                                                                                                                                                                                                                                                                                                                                                                                                                                               |
| Annual household income             | Based on block level 2000 US census data linked through KPSC members' addresses using geocoding.                                                                                                                                                                                                                                                                                                                                                                                                                                                                                                                                                                                                                                                                                                                                                                                                                                                                                                                                               |
| Alcohol consumption                 | Based on members' self-report.                                                                                                                                                                                                                                                                                                                                                                                                                                                                                                                                                                                                                                                                                                                                                                                                                                                                                                                                                                                                                 |
| Current smoking                     | Based on members' self-report.                                                                                                                                                                                                                                                                                                                                                                                                                                                                                                                                                                                                                                                                                                                                                                                                                                                                                                                                                                                                                 |
| Diabetes                            | Any of the following: <ol style="list-style-type: none"> <li>1. At least one inpatient stay with a discharge ICD-9 diagnosis code of 250.x in any position.</li> <li>2. At least two outpatient ICD-9 diagnosis codes of 250.x in any position.</li> </ol> Diabetes was ascertained using all available electronic health records before baseline.*                                                                                                                                                                                                                                                                                                                                                                                                                                                                                                                                                                                                                                                                                            |
| Reduced eGFR                        | For each KPSC member, eGFR was calculated using the CKD-EPI equation <sup>1</sup> in conjunction with serum creatinine measurements obtained at the Kaiser Permanente Regional Laboratory between 1 year before and 1 year after baseline.*<br>For KPSC members with >1 serum creatinine measurements, eGFR was calculated using the measurement on the closest date to their baseline. Reduced eGFR was defined by an eGFR <60 ml/min/1.73 m <sup>2.2</sup>                                                                                                                                                                                                                                                                                                                                                                                                                                                                                                                                                                                   |
| History of stroke                   | At least one ICD-9 diagnosis code of 430, 431, 432.0, 432.1, 432.9, 433.01, 433.11, 433.21, 433.31, 433.81, 433.91, 434.0, 434.00, 434.01, 434.1, 434.10, 434.11, 434.9, 434.90, 434.91, 436 or 438.x in any position using all available electronic health records before baseline.*                                                                                                                                                                                                                                                                                                                                                                                                                                                                                                                                                                                                                                                                                                                                                          |
| Use of antihypertensive medications | A dispense of any antihypertensive medication within 365 before baseline.*                                                                                                                                                                                                                                                                                                                                                                                                                                                                                                                                                                                                                                                                                                                                                                                                                                                                                                                                                                     |
| <i>Exclusion criteria</i>           |                                                                                                                                                                                                                                                                                                                                                                                                                                                                                                                                                                                                                                                                                                                                                                                                                                                                                                                                                                                                                                                |
| History of CHD                      | Any of the following: <ol style="list-style-type: none"> <li>1. Acute MI: At least one inpatient stay with a discharge ICD-9 diagnosis code of 410.x in any position.</li> <li>2. Coronary revascularization: At least one inpatient or outpatient code for PCI (ICD-9 procedure codes 00.66, 36.01, 36.02, 36.05-36.07, 36.09; CPT codes 92980-92982, 92984, 92995, 92996) or CABG (ICD-9 procedure codes 36.10-36.19; CPT codes 33510-33519, 33521-33523, 33530, 33533-33536, 93539, 93540)</li> <li>3. Other ischemic heart disease: Any of the following:               <ol style="list-style-type: none"> <li>a. At least one inpatient stay with a discharge ICD-9 diagnosis code of 411.xx, 412.00, 413.xx, or 414.xx in any position; or</li> <li>b. At least two outpatient ICD-9 diagnosis codes of 411.xx, 412.00, 413.xx, or 414.xx in any position.</li> </ol> </li> </ol> Acute MI, coronary revascularization and other ischemic heart disease were ascertained using all available electronic health records before baseline.* |
| Use of lipid-lowering medications   | A dispense of any lipid-lowering medication within 365 days before baseline.*                                                                                                                                                                                                                                                                                                                                                                                                                                                                                                                                                                                                                                                                                                                                                                                                                                                                                                                                                                  |

\* For each KPSC member, baseline was defined by the date of the first lipid panel containing TC, HDL-C, LDL-C and TG between January 1, 2003 and October 31, 2007 after ≥365 days of continuous healthcare coverage.

CABG: coronary artery bypass graft; CHD: coronary heart disease; CKD-EPI: Chronic Kidney Disease Epidemiology Collaboration; CPT: Current Procedural Terminology; eGFR: estimated glomerular filtration rate; HDL-C: high-density lipoprotein cholesterol; ICD-9: International Classification of Diseases, 9th version; KPSC: Kaiser Permanente Southern California; LDL-C: low-density lipoprotein cholesterol; MI: myocardial infarction; PCI: percutaneous coronary intervention; TC: total cholesterol; TG: triglycerides; US: United States.

**Supplemental Table 2.** Number of coronary heart disease incident events by serum lipids category among individuals from REGARDS, KPSC and ARIC.\*

|                                 | Category of serum lipids† |                         |                         |                 |
|---------------------------------|---------------------------|-------------------------|-------------------------|-----------------|
|                                 | 1                         | 2                       | 3                       | 4               |
| <b>LDL-C, range (mg/dL)</b>     | <b>≤102</b>               | <b>103 to 123</b>       | <b>124 to 145</b>       | <b>≥146</b>     |
| REGARDS, events/individuals‡    | 56 / 2,470                | 48 / 2,411              | 60 / 2,346              | 61 / 2,351      |
| KPSC, events/individuals        | 1,042 / 66,101            | 1,159 / 73,786          | 1,427 / 82,927          | 2,535 / 114,037 |
| ARIC, events/individuals‡       | 64 / 2,686                | 79 / 2,856              | 127 / 3,345             | 313 / 5,701     |
| <b>Non-HDL-C, range (mg/dL)</b> | <b>≤122</b>               | <b>123 to 146</b>       | <b>147 to 172</b>       | <b>≥173</b>     |
| REGARDS, events/individuals‡    | 42 / 2,408                | 53 / 2,419              | 63 / 2,394              | 67 / 2,357      |
| KPSC, events/individuals        | 775 / 59,707              | 1,022 / 72,460          | 1,522 / 87,038          | 3,228 / 127,390 |
| ARIC, events/individuals‡       | 51 / 2,643                | 82 / 2,951              | 125 / 3,457             | 325 / 5,539     |
| <b>HDL-C, range (mg/dL)</b>     | <b>≤41</b>                | <b>42 to 51</b>         | <b>52 to 63</b>         | <b>≥64</b>      |
| REGARDS, events/individuals‡    | 82 / 2,452                | 62 / 2,549              | 45 / 2,252              | 36 / 2,325      |
| KPSC, events/individuals        | 2,668 / 81,804            | 1,848 / 94,221          | 1,197 / 87,968          | 834 / 82,602    |
| ARIC, events/individuals‡       | 296 / 4,282               | 147 / 3,595             | 91 / 3,383              | 49 / 3,330      |
| <b>TG, range (mg/dL)</b>        | <b>≤77</b>                | <b>78 to 105</b>        | <b>106 to 151</b>       | <b>≥152</b>     |
| REGARDS, events/individuals‡    | 32 / 2,450                | 50 / 2,362              | 60 / 2,374              | 83 / 2,392      |
| KPSC, events/individuals        | 769 / 73,585              | 984 / 69,153            | 1,594 / 85,197          | 3,200 / 118,660 |
| ARIC, events/individuals‡       | 77 / 3,650                | 96 / 3,369              | 170 / 3,816             | 240 / 3,755     |
| <b>Total-to-HDL-C, range</b>    | <b>&lt;3.12</b>           | <b>3.12 to &lt;3.90</b> | <b>3.90 to &lt;4.90</b> | <b>≥4.90</b>    |
| REGARDS, events/individuals‡    | 40 / 2,406                | 45 / 2,392              | 55 / 2,392              | 85 / 2,388      |
| KPSC, events/individuals        | 679 / 70,834              | 994 / 80,844            | 1,640 / 91,759          | 3,234 / 103,158 |
| ARIC, events/individuals‡       | 40 / 3,005                | 59 / 2,969              | 141 / 3,480             | 343 / 5,136     |
| <b>TG-to-HDL-C ratio, range</b> | <b>&lt;1.31</b>           | <b>1.31 to &lt;2.06</b> | <b>2.06 to &lt;3.37</b> | <b>≥3.37</b>    |
| REGARDS, events/individuals‡    | 28 / 2,385                | 52 / 2,393              | 57 / 2,391              | 88 / 2,409      |
| KPSC, events/individuals        | 708 / 77,115              | 1,024 / 74,964          | 1,563 / 84,563          | 3,252 / 109,953 |
| ARIC, events/individuals‡       | 53 / 3,490                | 95 / 3,385              | 155 / 3,660             | 280 / 4,055     |

ARIC: Atherosclerosis Risk In Communities; CHD: coronary heart disease; HDL-C: high-density lipoprotein cholesterol; ICD-9: International Classification of Diseases, 9th version; ICD-10: International Classification of Diseases, 10th version; KPSC: Kaiser Permanente Southern California; LDL-C: low-density lipoprotein cholesterol; MI: myocardial infarction; REGARDS: REasons for Geographic And Racial Differences in Stroke; TG: triglycerides.

\* CHD definition from REGARDS and ARIC includes definite or probable MI or CHD death. CHD definition for KPSC includes non-fatal MI (defined by an inpatient stay with a discharge ICD-9 diagnosis code of 410.x in any position) or CHD death (defined by an underlying cause of death ICD-10 code I20-I25).

† Categories of serum lipids were defined based on quartiles from REGARDS participants.

‡ Average across multiple imputed datasets.

**Supplemental Table 3.** Hazard ratios for coronary heart disease associated with serum lipids among individuals from REGARDS, KPSC and ARIC.

|                             | Category of serum lipids* |                  |                  |                  | Trend   |
|-----------------------------|---------------------------|------------------|------------------|------------------|---------|
|                             | 1<br>HR (95% CI)          | 2<br>HR (95% CI) | 3<br>HR (95% CI) | 4<br>HR (95% CI) | p-value |
| <b>REGARDS</b>              |                           |                  |                  |                  |         |
| LDL-C, range (mg/dL)        | ≤102                      | 103 to 123       | 124 to 145       | ≥146             |         |
| Model 1                     | 1                         | 0.90 (0.59-1.38) | 1.13 (0.75-1.71) | 1.14 (0.75-1.74) | 0.38    |
| Model 2                     | 1                         | 0.92 (0.60-1.41) | 1.18 (0.78-1.79) | 1.15 (0.75-1.77) | 0.34    |
| Model 3                     | 1                         | 0.93 (0.61-1.43) | 1.23 (0.81-1.87) | 1.25 (0.81-1.92) | 0.19    |
| Non-HDL-C, range (mg/dL)    | ≤122                      | 123 to 146       | 147 to 172       | ≥173             |         |
| Model 1                     | 1                         | 1.21 (0.80-1.84) | 1.46 (0.97-2.20) | 1.59 (1.06-2.38) | 0.02    |
| Model 2                     | 1                         | 1.24 (0.82-1.89) | 1.50 (1.00-2.26) | 1.54 (1.03-2.31) | 0.02    |
| Model 3                     | 1                         | 1.19 (0.78-1.82) | 1.49 (0.99-2.25) | 1.49 (1.00-2.24) | 0.03    |
| HDL-C, range (mg/dL)        | ≤41                       | 42 to 51         | 52 to 63         | ≥64              |         |
| Model 1                     | 1                         | 0.81 (0.58-1.15) | 0.72 (0.49-1.08) | 0.61 (0.39-0.94) | 0.02    |
| Model 2                     | 1                         | 0.85 (0.60-1.21) | 0.83 (0.56-1.24) | 0.70 (0.45-1.09) | 0.12    |
| Model 3                     | 1                         | 0.97 (0.68-1.38) | 0.99 (0.66-1.49) | 0.83 (0.53-1.30) | 0.50    |
| TG, range (mg/dL)           | ≤77                       | 78 to 105        | 106 to 151       | ≥152             |         |
| Model 1                     | 1                         | 1.56 (0.98-2.50) | 1.83 (1.17-2.88) | 2.58 (1.65-4.05) | <0.001  |
| Model 2                     | 1                         | 1.43 (0.90-2.30) | 1.68 (1.07-2.64) | 2.12 (1.35-3.34) | 0.001   |
| Model 3                     | 1                         | 1.34 (0.84-2.15) | 1.48 (0.94-2.34) | 1.68 (1.06-2.67) | 0.03    |
| Total-to-HDL-C ratio, range | <3.12                     | 3.12 to <3.90    | 3.90 to <4.90    | ≥4.90            |         |
| Model 1                     | 1                         | 1.05 (0.67-1.65) | 1.21 (0.78-1.88) | 1.78 (1.18-2.67) | 0.003   |
| Model 2                     | 1                         | 1.02 (0.65-1.60) | 1.13 (0.73-1.77) | 1.57 (1.04-2.37) | 0.02    |
| Model 3                     | 1                         | 0.97 (0.62-1.53) | 1.10 (0.70-1.72) | 1.37 (0.90-2.08) | 0.08    |
| TG-to-HDL-C ratio, range    | <1.31                     | 1.31 to <2.06    | 2.06 to <3.37    | ≥3.37            |         |
| Model 1                     | 1                         | 1.69 (1.00-2.84) | 1.82 (1.10-3.00) | 2.71 (1.64-4.50) | <0.001  |
| Model 2                     | 1                         | 1.56 (0.92-2.64) | 1.59 (0.96-2.63) | 2.22 (1.33-3.70) | 0.002   |
| Model 3                     | 1                         | 1.52 (0.90-2.57) | 1.44 (0.87-2.38) | 1.78 (1.06-2.97) | 0.05    |

**Supplemental Table 3. Continuation.**

|                                    | Category of serum lipids* |                  |                  |                  | Trend   |
|------------------------------------|---------------------------|------------------|------------------|------------------|---------|
|                                    | 1<br>HR (95% CI)          | 2<br>HR (95% CI) | 3<br>HR (95% CI) | 4<br>HR (95% CI) | p-value |
| <b>KPSC</b>                        |                           |                  |                  |                  |         |
| <b>LDL-C, range (mg/dL)</b>        | ≤102                      | 103 to 123       | 124 to 145       | ≥146             |         |
| Model 1                            | 1                         | 0.95 (0.87-1.03) | 1.00 (0.93-1.09) | 1.28 (1.19-1.38) | <0.001  |
| Model 2                            | 1                         | 0.99 (0.91-1.08) | 1.04 (0.96-1.13) | 1.31 (1.21-1.41) | <0.001  |
| Model 3                            | 1                         | 1.06 (0.97-1.15) | 1.16 (1.07-1.26) | 1.49 (1.38-1.61) | <0.001  |
| <b>Non-HDL-C, range (mg/dL)</b>    | ≤122                      | 123 to 146       | 147 to 172       | ≥173             |         |
| Model 1                            | 1                         | 0.99 (0.90-1.09) | 1.16 (1.06-1.27) | 1.66 (1.54-1.80) | <0.001  |
| Model 2                            | 1                         | 1.03 (0.93-1.13) | 1.19 (1.09-1.30) | 1.65 (1.52-1.79) | <0.001  |
| Model 3                            | 1                         | 1.05 (0.96-1.16) | 1.23 (1.13-1.35) | 1.72 (1.59-1.87) | <0.001  |
| <b>HDL-C, range (mg/dL)</b>        | ≤41                       | 42 to 51         | 52 to 63         | ≥64              |         |
| Model 1                            | 1                         | 0.66 (0.62-0.70) | 0.50 (0.47-0.54) | 0.40 (0.37-0.44) | <0.001  |
| Model 2                            | 1                         | 0.69 (0.65-0.73) | 0.55 (0.51-0.59) | 0.46 (0.42-0.50) | <0.001  |
| Model 3                            | 1                         | 0.74 (0.70-0.79) | 0.63 (0.58-0.68) | 0.55 (0.50-0.60) | <0.001  |
| <b>TG, range (mg/dL)</b>           | ≤77                       | 78 to 105        | 106 to 151       | ≥152             |         |
| Model 1                            | 1                         | 1.28 (1.16-1.41) | 1.62 (1.48-1.76) | 2.24 (2.07-2.42) | <0.001  |
| Model 2                            | 1                         | 1.23 (1.12-1.36) | 1.53 (1.40-1.68) | 2.05 (1.89-2.22) | <0.001  |
| Model 3                            | 1                         | 1.18 (1.07-1.31) | 1.41 (1.29-1.54) | 1.75 (1.61-1.90) | <0.001  |
| <b>Total-to-HDL-C ratio, range</b> | <3.12                     | 3.12 to <3.90    | 3.90 to <4.90    | ≥4.90            |         |
| Model 1                            | 1                         | 1.14 (1.03-1.25) | 1.50 (1.37-1.64) | 2.46 (2.25-2.68) | <0.001  |
| Model 2                            | 1                         | 1.12 (1.01-1.24) | 1.45 (1.32-1.60) | 2.24 (2.05-2.45) | <0.001  |
| Model 3                            | 1                         | 1.09 (0.99-1.21) | 1.37 (1.25-1.51) | 2.02 (1.85-2.21) | <0.001  |
| <b>TG-to-HDL-C ratio, range</b>    | <1.31                     | 1.31 to <2.06    | 2.06 to <3.37    | ≥3.37            |         |
| Model 1                            | 1                         | 1.36 (1.24-1.50) | 1.73 (1.58-1.89) | 2.59 (2.38-2.82) | <0.001  |
| Model 2                            | 1                         | 1.31 (1.19-1.45) | 1.61 (1.47-1.77) | 2.32 (2.13-2.53) | <0.001  |
| Model 3                            | 1                         | 1.25 (1.13-1.38) | 1.47 (1.34-1.61) | 1.93 (1.77-2.11) | <0.001  |

**Supplemental Table 3. Continuation.**

|                                    | Category of serum lipids* |                  |                  |                  | Trend   |
|------------------------------------|---------------------------|------------------|------------------|------------------|---------|
|                                    | 1<br>HR (95% CI)          | 2<br>HR (95% CI) | 3<br>HR (95% CI) | 4<br>HR (95% CI) | p-value |
| <b>ARIC</b>                        |                           |                  |                  |                  |         |
| <b>LDL-C, range (mg/dL)</b>        | ≤102                      | 103 to 123       | 124 to 145       | ≥146             |         |
| Model 1                            | 1                         | 1.10 (0.78-1.55) | 1.42 (1.03-1.96) | 1.99 (1.50-2.64) | <0.001  |
| Model 2                            | 1                         | 1.10 (0.78-1.55) | 1.40 (1.02-1.93) | 1.97 (1.48-2.61) | <0.001  |
| Model 3                            | 1                         | 1.08 (0.77-1.52) | 1.39 (1.01-1.91) | 1.89 (1.42-2.51) | <0.001  |
| <b>Non-HDL-C, range (mg/dL)</b>    | ≤122                      | 123 to 146       | 147 to 172       | ≥173             |         |
| Model 1                            | 1                         | 1.33 (0.93-1.90) | 1.63 (1.17-2.27) | 2.58 (1.90-3.50) | <0.001  |
| Model 2                            | 1                         | 1.33 (0.93-1.90) | 1.61 (1.16-2.25) | 2.55 (1.88-3.45) | <0.001  |
| Model 3                            | 1                         | 1.28 (0.89-1.82) | 1.50 (1.08-2.10) | 2.24 (1.65-3.04) | <0.001  |
| <b>HDL-C, range (mg/dL)</b>        | ≤41                       | 42 to 51         | 52 to 63         | ≥64              |         |
| Model 1                            | 1                         | 0.62 (0.51-0.77) | 0.43 (0.33-0.55) | 0.26 (0.18-0.35) | <0.001  |
| Model 2                            | 1                         | 0.66 (0.53-0.81) | 0.47 (0.36-0.60) | 0.29 (0.21-0.41) | <0.001  |
| Model 3                            | 1                         | 0.74 (0.60-0.92) | 0.58 (0.45-0.74) | 0.40 (0.29-0.56) | <0.001  |
| <b>TG, range (mg/dL)</b>           | ≤77                       | 78 to 105        | 106 to 151       | ≥152             |         |
| Model 1                            | 1                         | 1.32 (0.97-1.80) | 1.98 (1.50-2.62) | 2.82 (2.16-3.69) | <0.001  |
| Model 2                            | 1                         | 1.28 (0.94-1.74) | 1.90 (1.44-2.52) | 2.69 (2.05-3.52) | <0.001  |
| Model 3                            | 1                         | 1.21 (0.89-1.65) | 1.64 (1.24-2.17) | 1.94 (1.47-2.55) | <0.001  |
| <b>Total-to-HDL-C ratio, range</b> | <3.12                     | 3.12 to <3.90    | 3.90 to <4.90    | ≥4.90            |         |
| Model 1                            | 1                         | 1.35 (0.90-2.05) | 2.61 (1.82-3.75) | 4.11 (2.91-5.79) | <0.001  |
| Model 2                            | 1                         | 1.32 (0.87-2.00) | 2.47 (1.72-3.55) | 3.71 (2.63-5.24) | <0.001  |
| Model 3                            | 1                         | 1.25 (0.83-1.90) | 2.14 (1.49-3.08) | 2.90 (2.05-4.10) | <0.001  |
| <b>TG-to-HDL-C ratio, range</b>    | <1.31                     | 1.31 to <2.06    | 2.06 to <3.37    | ≥3.37            |         |
| Model 1                            | 1                         | 1.73 (1.21-2.47) | 2.50 (1.80-3.46) | 3.99 (2.92-5.46) | <0.001  |
| Model 2                            | 1                         | 1.67 (1.17-2.39) | 2.33 (1.68-3.23) | 3.60 (2.63-4.92) | <0.001  |
| Model 3                            | 1                         | 1.55 (1.09-2.21) | 1.98 (1.42-2.75) | 2.56 (1.86-3.52) | <0.001  |

ARIC: Atherosclerosis Risk In Communities; CHD: coronary heart disease; CI: confidence interval; eGFR: estimated glomerular filtration rate; HDL-C: high-density lipoprotein cholesterol; HR: hazard ratio; ICD-9: International Classification of Diseases, 9th version; ICD-10: International Classification of Diseases, 10th version; KPSC: Kaiser Permanente Southern California; LDL-C: low-density lipoprotein cholesterol; MI: myocardial infarction; REGARDS: REasons for Geographic And Racial Differences in Stroke; TG: triglycerides.

\* Categories of serum lipids were defined based on quartiles from REGARDS participants.

CHD definition from REGARDS and ARIC includes definite or probable MI or CHD death. CHD definition for KPSC includes non-fatal MI (defined by an inpatient stay with a discharge ICD-9 diagnosis code of 410.x in any position) or CHD death (defined by an underlying cause of death ICD-10 code I20-I25).

Analysis from REGARDS includes 225 events from 9,578 participants. Analysis from KPSC is limited to 8.9 years of follow-up and includes 6,547 events from 346,595 members (6,163 events from 336,851 members for the analysis of LDL-C). Analysis from ARIC is limited to 8.9 years of follow-up and includes 583 events from 14,590 participants.

Model 1 includes adjustment for age, race and sex. For REGARDS, Model 1 also includes adjustment for region of residence.

Model 2 includes adjustment for covariates in Model 1 plus education and income levels, alcohol consumption and current smoking.

Model 3 includes adjustment for covariates in Model 2 plus diabetes, reduced eGFR, stroke and use of antihypertensive medications.

**Supplemental Table 4.** Hazard ratios for coronary heart disease associated with LDL-C levels among individuals from REGARDS, KPSC and ARIC.

| LDL-C, range (mg/dL) | Category of serum lipids* |                  |                  |                  |                  | Trend   |
|----------------------|---------------------------|------------------|------------------|------------------|------------------|---------|
|                      | 1<br>HR (95% CI)          | 2<br>HR (95% CI) | 3<br>HR (95% CI) | 4<br>HR (95% CI) | 5<br>HR (95% CI) | p-value |
|                      | ≤102                      | 103 to 123       | 124 to 145       | 146 to 189       | ≥190             |         |
| <b>REGARDS</b>       |                           |                  |                  |                  |                  |         |
| Model 1              | 1                         | 0.88 (0.57-1.36) | 1.14 (0.76-1.70) | 1.07 (0.71-1.63) | 1.69 (0.86-3.32) | 0.23    |
| Model 2              | 1                         | 0.90 (0.59-1.39) | 1.18 (0.79-1.76) | 1.09 (0.72-1.66) | 1.62 (0.83-3.19) | 0.21    |
| Model 3              | 1                         | 0.92 (0.60-1.41) | 1.24 (0.84-1.85) | 1.18 (0.78-1.80) | 1.77 (0.90-3.49) | 0.09    |
| <b>KPSC</b>          |                           |                  |                  |                  |                  |         |
| Model 1              | 1                         | 0.95 (0.87-1.03) | 1.00 (0.93-1.09) | 1.17 (1.08-1.26) | 1.77 (1.61-1.95) | <0.001  |
| Model 2              | 1                         | 0.99 (0.91-1.08) | 1.04 (0.96-1.13) | 1.21 (1.12-1.30) | 1.75 (1.58-1.93) | <0.001  |
| Model 3              | 1                         | 1.06 (0.97-1.15) | 1.16 (1.07-1.26) | 1.38 (1.27-1.49) | 2.00 (1.80-2.21) | <0.001  |
| <b>ARIC</b>          |                           |                  |                  |                  |                  |         |
| Model 1              | 1                         | 1.07 (0.75-1.53) | 1.42 (1.03-1.96) | 1.84 (1.36-2.48) | 2.61 (1.86-3.66) | <0.001  |
| Model 2              | 1                         | 1.07 (0.75-1.54) | 1.39 (1.01-1.92) | 1.83 (1.35-2.47) | 2.50 (1.78-3.49) | <0.001  |
| Model 3              | 1                         | 1.06 (0.74-1.51) | 1.38 (1.00-1.91) | 1.76 (1.30-2.38) | 2.38 (1.70-3.33) | <0.001  |

ARIC: Atherosclerosis Risk In Communities; CHD: coronary heart disease; CI: confidence interval; eGFR: estimated glomerular filtration rate; HR: hazard ratio; ICD-9: International Classification of Diseases, 9th version; ICD-10: International Classification of Diseases, 10th version; KPSC: Kaiser Permanente Southern California; LDL-C: low-density lipoprotein cholesterol; MI: myocardial infarction; REGARDS: REasons for Geographic And Racial Differences in Stroke.

\* Categories of serum lipids were defined based on quartiles from REGARDS participants.

CHD definition from REGARDS and ARIC includes definite or probable MI or CHD death. CHD definition for KPSC includes non-fatal MI (defined by an inpatient stay with a discharge ICD-9 diagnosis code of 410.x in any position) or CHD death (defined by an underlying cause of death ICD-10 code I20-I25).

Analysis from REGARDS includes 225 events from 9,578 participants. Analysis from KPSC is limited to 8.9 years of follow-up and includes 6,163 events from 336,851 members. Analysis from ARIC is limited to 8.9 years of follow-up and includes 583 events from 14,590 participants.

Model 1 includes adjustment for age, race and sex. For REGARDS, Model 1 also includes adjustment for region of residence.

Model 2 includes adjustment for covariates in Model 1 plus education and income levels, alcohol consumption and current smoking.

Model 3 includes adjustment for covariates in Model 2 plus diabetes, reduced eGFR, stroke and use of antihypertensive medications.

**Supplemental Table 5.** Hazard ratios for coronary heart disease associated with serum lipids among individuals from REGARDS, KPSC and ARIC (analyzing lipids as continuous variables).

|                                              | REGARDS<br>HR (95% CI) | KPSC<br>HR (95% CI) | ARIC<br>HR (95% CI) |
|----------------------------------------------|------------------------|---------------------|---------------------|
| LDL-C, per 30 mg/dL increase                 |                        |                     |                     |
| Model 1                                      | 1.08 (0.95-1.23)       | 1.13 (1.01-1.15)    | 1.25 (1.17-1.32)    |
| Model 2                                      | 1.08 (0.96-1.23)       | 1.13 (1.10-1.15)    | 1.24 (1.16-1.31)    |
| Model 3                                      | 1.12 (0.99-1.27)       | 1.16 (1.14-1.19)    | 1.22 (1.15-1.30)    |
| Non-HDL-C, per 40 mg/dL increase             |                        |                     |                     |
| Model 1                                      | 1.22 (1.06-1.39)       | 1.26 (1.24-1.29)    | 1.43 (1.33-1.52)    |
| Model 2                                      | 1.19 (1.04-1.35)       | 1.24 (1.22-1.27)    | 1.41 (1.32-1.51)    |
| Model 3                                      | 1.18 (1.04-1.35)       | 1.24 (1.21-1.26)    | 1.34 (1.26-1.44)    |
| HDL-C, per 20 mg/dL increase                 |                        |                     |                     |
| Model 1                                      | 0.76 (0.62-0.93)       | 0.63 (0.61-0.66)    | 0.49 (0.43-0.57)    |
| Model 2                                      | 0.82 (0.67-1.01)       | 0.68 (0.65-0.71)    | 0.53 (0.46-0.61)    |
| Model 3                                      | 0.90 (0.74-1.10)       | 0.75 (0.72-0.78)    | 0.64 (0.56-0.73)    |
| TG, per 100 mg/dL increase                   |                        |                     |                     |
| Model 1                                      | 1.12 (1.04-1.20)       | 1.11 (1.10-1.12)    | 1.25 (1.19-1.31)    |
| Model 2                                      | 1.10 (1.01-1.19)       | 1.11 (1.10-1.12)    | 1.25 (1.19-1.31)    |
| Model 3                                      | 1.06 (0.95-1.18)       | 1.09 (1.08-1.10)    | 1.15 (1.09-1.22)    |
| Total-to-HDL-C ratio, per 1.3 units increase |                        |                     |                     |
| Model 1                                      | 1.21 (1.10-1.31)       | 1.03 (1.02-1.03)    | 1.35 (1.30-1.40)    |
| Model 2                                      | 1.17 (1.07-1.28)       | 1.03 (1.03-1.03)    | 1.33 (1.28-1.38)    |
| Model 3                                      | 1.14 (1.03-1.26)       | 1.03 (1.03-1.03)    | 1.24 (1.19-1.30)    |
| TG-to-HDL-C ratio, per 3 units increase      |                        |                     |                     |
| Model 1                                      | 1.04 (1.01-1.08)       | 1.03 (1.03-1.03)    | 1.14 (1.11-1.17)    |
| Model 2                                      | 1.04 (0.99-1.08)       | 1.07 (1.06-1.08)    | 1.12 (1.09-1.15)    |
| Model 3                                      | 1.03 (0.97-1.09)       | 1.06 (1.05-1.07)    | 1.08 (1.05-1.12)    |

ARIC: Atherosclerosis Risk In Communities; CHD: coronary heart disease; CI: confidence interval; eGFR: estimated glomerular filtration rate; HDL-C: high-density lipoprotein cholesterol; HR: hazard ratio; ICD-9: International Classification of Diseases, 9th version; ICD-10: International Classification of Diseases, 10th version; KPSC: Kaiser Permanente Southern California; LDL-C: low-density lipoprotein cholesterol; MI: myocardial infarction; REGARDS: REasons for Geographic And Racial Differences in Stroke; TG: triglycerides.

\* Categories of serum lipids were defined based on quartiles from REGARDS participants.

CHD definition from REGARDS and ARIC includes definite or probable MI or CHD death. CHD definition for KPSC includes non-fatal MI (defined by an inpatient stay with a discharge ICD-9 diagnosis code of 410.x in any position) or CHD death (defined by an underlying cause of death ICD-10 code I20-I25).

Analysis from REGARDS includes 225 events from 9,578 participants. Analysis from KPSC is limited to 8.9 years of follow-up and includes 6,547 events from 346,595 members (6,163 events from 336,851 members for the analysis of LDL-C). Analysis from ARIC is limited to 8.9 years of follow-up and includes 583 events from 14,590 participants.

Model 1 includes adjustment for age, race and sex. For REGARDS, Model 1 also includes adjustment for region of residence.

Model 2 includes adjustment for covariates in Model 1 plus education and income levels, alcohol consumption and current smoking.

Model 3 includes adjustment for covariates in Model 2 plus diabetes, reduced eGFR, stroke and use of antihypertensive medications.



**Supplemental Table 6.** Hazard ratios for coronary heart disease associated with serum lipids among individuals from REGARDS, KPSC and ARIC (categories defined based on ARIC quartiles).

|                                    | Category of serum lipids* |                  |                  |                  | Trend   |
|------------------------------------|---------------------------|------------------|------------------|------------------|---------|
|                                    | 1<br>HR (95% CI)          | 2<br>HR (95% CI) | 3<br>HR (95% CI) | 4<br>HR (95% CI) | p-value |
| <b>LDL-C, range (mg/dL)</b>        | ≤111                      | 112 to 134       | 135 to 160       | ≥161             |         |
| REGARDS                            | 1                         | 1.22 (0.83-1.79) | 1.41 (0.96-2.06) | 1.46 (0.93-2.30) | 0.04    |
| KPSC                               | 1                         | 1.11 (1.03-1.20) | 1.23 (1.14-1.32) | 1.68 (1.57-1.81) | <0.001  |
| ARIC                               | 1                         | 1.26 (0.95-1.67) | 1.40 (1.05-1.85) | 2.03 (1.56-2.63) | <0.001  |
| <b>Non-HDL-C, range (mg/dL)</b>    | ≤132                      | 133 to 159       | 160 to 188       | ≥189             |         |
| REGARDS                            | 1                         | 1.05 (0.72-1.54) | 1.66 (1.15-2.40) | 1.54 (1.02-2.31) | 0.005   |
| KPSC                               | 1                         | 1.09 (1.01-1.19) | 1.36 (1.26-1.47) | 1.84 (1.71-1.98) | <0.001  |
| ARIC                               | 1                         | 1.39 (1.04-1.85) | 1.38 (1.04-1.85) | 2.36 (1.82-3.06) | <0.001  |
| <b>HDL-C, range (mg/dL)</b>        | ≤39                       | 40 to 49         | 50 to 62         | ≥63              |         |
| REGARDS                            | 1                         | 0.80 (0.56-1.16) | 0.96 (0.65-1.43) | 0.81 (0.52-1.28) | 0.54    |
| KPSC                               | 1                         | 0.79 (0.74-0.84) | 0.62 (0.58-0.67) | 0.55 (0.50-0.60) | <0.001  |
| ARIC                               | 1                         | 0.67 (0.55-0.83) | 0.62 (0.49-0.78) | 0.39 (0.28-0.54) | <0.001  |
| <b>TG, range (mg/dL)</b>           | ≤77                       | 78 to 108        | 109 to 153       | ≥154             |         |
| REGARDS                            | 1                         | 1.27 (0.80-2.03) | 1.49 (0.93-2.37) | 1.74 (1.09-2.78) | 0.01    |
| KPSC                               | 1                         | 1.23 (1.12-1.35) | 1.39 (1.27-1.52) | 1.76 (1.62-1.91) | <0.001  |
| ARIC                               | 1                         | 1.24 (0.92-1.68) | 1.65 (1.24-2.19) | 1.95 (1.48-2.57) | <0.001  |
| <b>Total-to-HDL-C ratio, range</b> | <3.30                     | 3.30 to <4.27    | 4.27 to <5.44    | ≥5.44            |         |
| REGARDS                            | 1                         | 1.13 (0.74-1.73) | 1.29 (0.85-1.95) | 1.74 (1.14-2.65) | 0.01    |
| KPSC                               | 1                         | 1.13 (1.04-1.24) | 1.55 (1.43-1.69) | 2.24 (2.06-2.44) | <0.001  |
| ARIC                               | 1                         | 1.55 (1.10-2.19) | 1.97 (1.42-2.74) | 3.13 (2.28-4.29) | <0.001  |
| <b>TG-to-HDL-C ratio, range</b>    | <1.34                     | 1.34 to <2.17    | 2.17 to <3.57    | ≥3.57            |         |
| REGARDS                            | 1                         | 1.60 (0.99-2.59) | 1.48 (0.90-2.45) | 2.03 (1.25-3.30) | 0.01    |
| KPSC                               | 1                         | 1.23 (1.12-1.36) | 1.49 (1.36-1.63) | 1.92 (1.76-2.09) | <0.001  |
| ARIC                               | 1                         | 1.55 (1.11-2.18) | 1.93 (1.40-2.65) | 2.49 (1.83-3.41) | <0.001  |

ARIC: Atherosclerosis Risk In Communities; CHD: coronary heart disease; CI: confidence interval; eGFR: estimated glomerular filtration rate; HDL-C: high-density lipoprotein cholesterol; HR: hazard ratio; ICD-9: International Classification of Diseases, 9th version; ICD-10: International Classification of Diseases, 10th version; KPSC: Kaiser Permanente Southern California; LDL-C: low-density lipoprotein cholesterol; MI: myocardial infarction; REGARDS: REasons for Geographic And Racial Differences in Stroke; TG: triglycerides.

\* Categories of lipids markers were defined based on quartiles from ARIC participants.

CHD definition from REGARDS and ARIC includes definite or probable MI or CHD death. CHD definition for KPSC includes non-fatal MI (defined by an inpatient stay with a discharge ICD-9 diagnosis code of 410.x in any position) or CHD death (defined by an underlying cause of death ICD-10 code I20-I25).

Analysis from REGARDS includes 225 events from 9,578 participants. Analysis from KPSC is limited to 8.9 years of follow-up and includes 6,547 events from 346,595 members (6,163 events from 336,851 members for the analysis of LDL-C). Analysis from ARIC is limited to 8.9 years of follow-up and includes 583 events from 14,590 participants.

All analyses include adjustment for age, race, sex, education and income levels, alcohol consumption, current smoking, diabetes, reduced eGFR, stroke and use of antihypertensive medications. Analyses in REGARDS also include adjustment for region of residence.

## References

1. Levey AS, Stevens LA, Schmid CH, Zhang YL, Castro AF, 3rd, Feldman HI, Kusek JW, Eggers P, Van Lente F, Greene T, Coresh J. A new equation to estimate glomerular filtration rate. *Annals of internal medicine*. 2009;150:604-612
2. Kidney Disease: Improving Global Outcomes (KDIGO) CKD Work Group. KDIGO 2012 Clinical Practice Guideline for the Evaluation and Management of Chronic Kidney Disease. *Kidney international. Supplement*. 2013;3:1-150
